# Supplementary material
Source: Research Square preprint supplement (doi:10.21203/rs.3.rs-8984740/v1)
Supplement: Supplementary file 1 [file 0b82adcc7f8e731f91ef6a69.doc]

**Title: Association Between Red Blood Cell Distribution Width and Liver Injury in Children with Epstein-Barr Virus Infection: A Retrospective Study with Incremental Predictive Value Assessment**

**Supplementary Materials**

**Supplementary table 1. Baseline characteristics of the study population after imputation.**

**Supplementary table 1. Baseline characteristics of the study population after imputation.**

| Variables | Total (n = 123) | Non-Liver Injury  (n = 75) | Liver Injury  (n = 48) | *P* |
| --- | --- | --- | --- | --- |
| Hospitalization Duration | 6.7 ± 1.6 | 6.5 ± 1.6 | 6.9 ± 1.7 | 0.220 |
| Hospitalization Cost | 3644.4 ± 1677.2 | 3418.6 ± 1040.3 | 3997.3 ± 2321.4 | 0.062 |
| Sex, n (%) |  |  |  | 0.083 |
| Male | 83 (67.5) | 55 (73.3) | 28 (58.3) |  |
| Female | 40 (32.5) | 20 (26.7) | 20 (41.7) |  |
| Age,day | 5.2 ± 2.5 | 4.9 ± 2.3 | 5.7 ± 2.7 | 0.071 |
| Weight,kg | 21.0 ± 9.4 | 20.1 ± 8.3 | 22.4 ± 10.7 | 0.192 |
| Pre-admission fever duration,day | 3.0 ± 2.0 | 2.7 ± 1.6 | 3.4 ± 2.4 | 0.046 |
| Post-admission fever duration,day | 2.0 (1.0, 3.0) | 2.0 (1.0, 3.0) | 2.5 (1.0, 3.2) | 0.459 |
| Total fever duration,day | 5.4 ± 2.7 | 4.9 ± 2.1 | 6.0 ± 3.3 | 0.026 |
| Eyelid edema, n (%) |  |  |  | 0.185 |
| No | 63 (51.2) | 42 (56.0) | 21 (43.8) |  |
| Yes | 60 (48.8) | 33 (44.0) | 27 (56.2) |  |
| Tonsillar enlargement with suppuration, n (%) |  |  |  | 0.219 |
| No | 24 (19.5) | 12 (16.0) | 12 (25.0) |  |
| Yes | 99 (80.5) | 63 (84.0) | 36 (75.0) |  |
| Cervical lymphadenopathy, n (%) |  |  |  | 0.430 |
| No | 7 ( 5.7) | 3 (4.0) | 4 (8.3) |  |
| Yes | 116 (94.3) | 72 (96.0) | 44 (91.7) |  |
| Associated symptoms n (%) |  |  |  | 0.313 |
| None | 78 (63.4) | 42 (56) | 36 (75.0) |  |
| Cough | 15 (12.2) | 11 (14.7) | 4 (8.3) |  |
| Sorethroat | 20 (16.3) | 14 (18.7) | 6 (12.5) |  |
| Rash | 7 ( 5.7) | 6 (8.0) | 1 (2.1) |  |
| Nasal congestion | 1 ( 0.8) | 1 (1.3) | 0 (0) |  |
| Abdominal pain and diarrhea | 2 ( 1.6) | 1 (1.3) | 1 (2.1) |  |
| Past medical history, n (%) |  |  |  | 0.621 |
| None | 121 (98.4) | 74 (98.7) | 47 (97.9) |  |
| Asthma | 1 ( 0.8) | 0 (0) | 1 (2.1) |  |
| Rhinitis | 1 ( 0.8) | 1 (1.3) | 0 (0) |  |
| Imaging features, n (%) |  |  |  | 0.318 |
| None | 62 (50.4) | 38 (50.7) | 24 (50.0) |  |
| Bronchitis | 40 (32.5) | 27 (36.0) | 13 (27.1) |  |
| Pneumonia | 21 (17.1) | 10 (13.3) | 11 (22.9) |  |
| Left neck ultrasound, n (%) |  |  |  | 0.540 |
| ≥10cm | 27 (22.0) | 16 (21.3) | 11 (22.9) |  |
| ≥20cm | 61 (49.6) | 40 (53.3) | 21 (43.8) |  |
| ≥30cm | 35 (28.5) | 19 (25.3) | 16 (33.3) |  |
| Right neck ultrasound, n (%) |  |  |  | 0.401 |
| ≥10cm | 24 (19.5) | 16 (21.3) | 8 (16.7) |  |
| ≥20cm | 59 (48.0) | 38 (50.7) | 21 (43.8) |  |
| ≥30cm | 40 (32.5) | 21 (28.0) | 19 (39.6) |  |
| Abdominal ultrasound, n (%) |  |  |  | 0.858 |
| None | 73 (59.3) | 46 (61.3) | 27 (56.2) |  |
| Splenomegaly | 48 (39.0) | 28 (37.3) | 20 (41.7) |  |
| Hepatomegaly | 2 ( 1.6) | 1 (1.3) | 1 (2.1) |  |
| Atypical lymphocytes | 10.0 (5.0, 16.0) | 10.0 (5.0, 15.0) | 10.0 (4.0, 17.0) | 0.942 |
| EB DNA Positive, n (%) |  |  |  | 0.755 |
| No | 14 (11.4) | 8 (10.7) | 6 (12.5) |  |
| Yes | 109 (88.6) | 67 (89.3) | 42 (87.5) |  |
| CRP, mg/L | 7.3 (4.0, 14.4) | 9.2 (4.0, 16.3) | 5.8 (4.1, 8.9) | 0.076 |
| WBC, 109/L | 14.5 ± 5.5 | 13.9 ± 5.0 | 15.5 ± 6.3 | 0.124 |
| NEUT, 109/L | 3.7 ± 2.0 | 3.8 ± 1.9 | 3.6 ± 2.0 | 0.659 |
| LYMPH, 109/L | 9.4 ± 4.1 | 8.9 ± 3.8 | 10.2 ± 4.4 | 0.071 |
| NLR | 0.4 (0.3, 0.5) | 0.4 (0.3, 0.6) | 0.3 (0.2, 0.4) | 0.024 |
| MLR | 0.1 (0.1, 0.1) | 0.1 (0.1, 0.1) | 0.1 (0.1, 0.1) | 0.942 |
| ALT/Lymphocytes | 6.4 (4.0, 14.6) | 4.3 (3.0, 5.8) | 15.8 (11.3, 29.6) | < 0.001 |
| PLR | 26.5 ± 16.4 | 28.4 ± 16.5 | 23.6 ± 16.1 | 0.116 |
| MONO, 109/L | 0.7 (0.4, 1.3) | 0.7 (0.4, 1.2) | 0.8 (0.5, 1.3) | 0.277 |
| HGB, g/L | 122.4 ± 11.1 | 121.6 ± 10.2 | 123.6 ± 12.5 | 0.318 |
| RDW-CV, % | 13.4 ± 0.9 | 13.2 ± 0.8 | 13.6 ± 1.0 | 0.022 |
| RDW-SD, fL | 39.5 (38.0, 41.0) | 39.0 (37.8, 40.5) | 40.2 (38.3, 41.8) | 0.019 |
| PLT, 109/L | 204.5 ± 64.2 | 207.5 ± 59.0 | 199.9 ± 71.9 | 0.524 |
| ALT, U/L | 63.0 (31.5, 110.6) | 36.6 (23.2, 48.0) | 157.0 (95.7, 284.0) | < 0.001 |
| AST, U/L | 56.0 (40.9, 92.0) | 45.0 (36.2, 55.0) | 128.0 (73.6, 217.8) | < 0.001 |
| LDH, U/L | 602.4 ± 285.1 | 587.5 ± 319.1 | 625.8 ± 223.2 | 0.469 |
| CK, U/L | 53.8 ± 21.5 | 56.3 ± 23.5 | 50.0 ± 17.5 | 0.114 |
| CKMB, U/L | 14.3 ± 7.0 | 14.4 ± 6.6 | 14.3 ± 7.7 | 0.972 |
| Ferritin, ng/ml | 155.8 (87.3, 230.5) | 137.6 (77.5, 189.9) | 195.8 (128.7, 302.6) | < 0.001 |
| PCT, ng/ml | 0.2 (0.1, 0.2) | 0.2 (0.1, 0.2) | 0.2 (0.1, 0.3) | 0.005 |
| ESR, mm/h | 15.0 (10.0, 25.0) | 18.0 (10.0, 25.0) | 15.0 (10.0, 21.2) | 0.295 |
| Antiviral therapy, n (%) |  |  |  | 1.000 |
| No | 3 ( 2.4) | 2 (2.7) | 1 (2.1) |  |
| Yes | 120 (97.6) | 73 (97.3) | 47 (97.9) |  |
| Liver protective therapy, n (%) |  |  |  | < 0.001 |
| No | 68 (55.3) | 66 (88.0) | 2 (4.2) |  |
| Yes | 55 (44.7) | 9 (12.0) | 46 (95.8) |  |
| Corticosteroids, n (%) |  |  |  | 0.295 |
| No | 91 (74.0) | 53 (70.7) | 38 (79.2) |  |
| Yes | 32 (26.0) | 22 (29.3) | 10 (20.8) |  |

Notes: Data are presented as mean ± standard deviation (SD) for normally distributed continuous variables, median (interquartile range, IQR) for skewed continuous variables, and number (percentage) for categorical variables. Liver injury was defined as ALT >80 U/L. Continuous variables were compared using Student's t-test (normal distribution) or Mann-Whitney U test (non-normal distribution); categorical variables were compared with *χ*² test or Fisher's exact test as appropriate. Missing data were addressed through single imputation by chained equations under the missing-at-random assumption.
